# Supplementary material for: Concomitant polymorphs of methoxyflavone (5-methyl-7-methoxyflavone)
Source: Royal Society of Chemistry journal article supplement (doi:10.1039/c6ra05995c), 2016-01-01

**Supporting information**

Table S1 d-Spacings(Å), 2θ Values(°) and relative intensities (%) of the ten most intense peaks in XPRD patterns of methoxyflavone polymorphs

| No | Form A |       |                  | Form B |       |                  |
|----|--------|-------|------------------|--------|-------|------------------|
|    | d      | 2θ    | I/I <sub>0</sub> | d      | 2θ    | I/I <sub>0</sub> |
| 1  | 7.54   | 11.72 | 100.0            | 12.55  | 7.04  | 100.0            |
| 2  | 4.06   | 21.90 | 67.3             | 8.34   | 10.60 | 44.8             |
| 3  | 3.51   | 25.36 | 66.2             | 6.98   | 12.68 | 15.9             |
| 4  | 5.12   | 17.32 | 62.8             | 3.55   | 20.06 | 15.9             |
| 5  | 3.17   | 28.16 | 38.8             | 10.75  | 8.22  | 13.9             |
| 6  | 3.30   | 27.02 | 37.5             | 4.33   | 20.50 | 11.3             |
| 7  | 5.80   | 15.26 | 29.2             | 3.67   | 24.26 | 10.4             |
| 8  | 8.20   | 10.78 | 22.2             | 4.23   | 20.96 | 10.2             |
| 9  | 4.81   | 18.44 | 20.8             | 6.20   | 14.28 | 6.5              |
| 10 | 4.97   | 17.82 | 19.4             | 5.71   | 15.50 | 6.1              |

Table S2 Main vibrational data (cm<sup>-1</sup>) with tentative assignments for polymorphs of methoxyflavone

| Vibrational data        |                        | Vibrational assignment             |
|-------------------------|------------------------|------------------------------------|
| form A                  | form B                 |                                    |
| 3074                    | 3081                   | Ar-H stretch vibration             |
| 1634                    | 1632, 1622             | C=O stretch vibration              |
| 1600, 1563, 1453        | 1600, 1566, 1451       | C=C stretch vibration              |
| 1258, 1216, 1139, 1071  | 1253, 1217, 1136, 1072 | C-O stretch vibration              |
| 856, 826, 758, 701, 693 | 858, 828, 754, 696     | C-H out-of-plane bending vibration |

Fig S1 TGA diagram of polymorphs of methoxyflavone

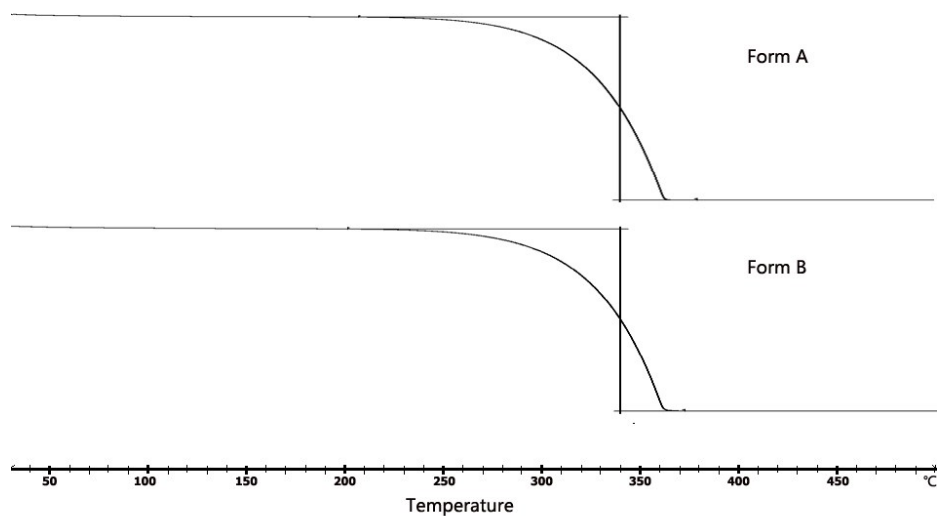

Fig S2 Polymorph transformation of methoxyflavone amorphous phase

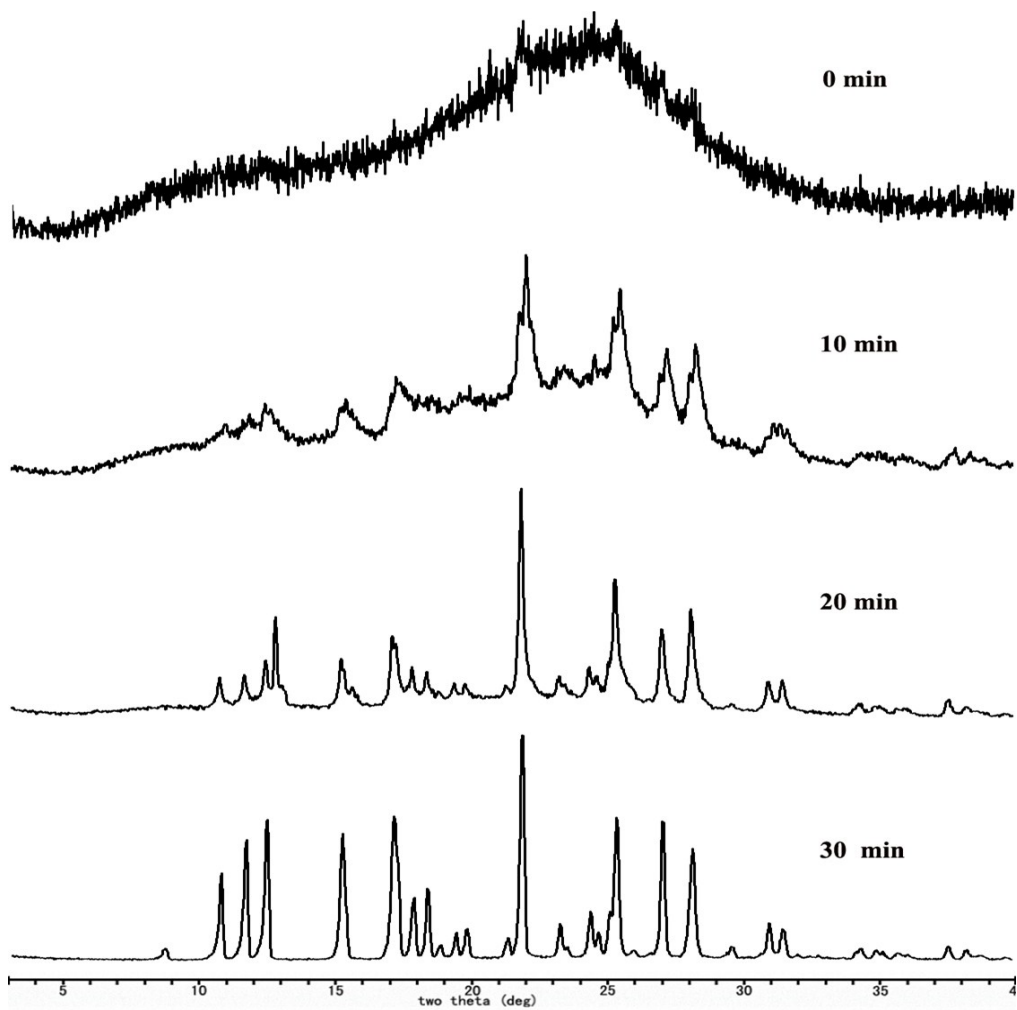

Supplement: c6ra05995c1.pdf [file c6ra05995c1.pdf]
